# Supplementary material for: China says no towards the second large-scale COVID-19 outbreak: voices from the online public
Source: PubMed Central journal article supplement — Gen Psychiatr. 2021 Oct 18;34(5):e100517. doi: 10.1136/gpsych-2021-100517 (PMC8523963; doi:10.1136/gpsych-2021-100517), 2021-10-18
Supplement: gpsych-2021-100517supp001.pdf [file gpsych-2021-100517supp001.pdf]

General information:

1. Gender
2. Age
3. City of employment
4. Educational level
5. Occupation

In the past phases of the epidemic:

6. Have you ever been diagnosed with COVID-19?
7. Have you ever been asymptomatic infected with COVID-19?
8. Do you have relatives or friends who have been diagnosed with COVID-19 (or asymptomatic infection) ?
9. Is there any confirmed case (or asymptomatic infected person) in your neighborhoods(or community, village)?
10. Have you ever lived in Hubei during the COVID-19 outbreak?
11. Have you ever taken part in any action against the epidemic?
12. What's your role in the fight against the epidemic?
13. What were your sources of stress during the epidemic?
14. The extent to which your mental state was affected by the past COVID-19 epidemic?
15. The extent to which your work and life were affected by the past COVID-19 epidemic?

Over the past half month:

16. How often you still following the reports related to the epidemic?
17. How often you insist on wearing a mask seriously except the places or occasions where it is required?
18. If there is a confirmed COVID-19 case in your city, the degree to which you feel anxious, nervous, worried, or afraid?
19. What do you think is the likelihood of a secondary large-scale outbreak in China?
20. If COVID-19 second outbreak, how much confidence do you have in government's ability to deal with the epidemic?
21. The following are the effective measures to deal with the epidemic. Please rank them in order of importance( wearing a mask; strictly prevent and control imported

cases from abroad; vaccinating; home quarantine; managing the safety of imported cold-chain food)

22. If COVID-19 second outbreak, and based on mass vaccination, do you think it's necessary to follow the existing, standard public health measures?
23. If COVID-19 second outbreak, will you be as anxious, nervous, worried, scared, and fearful as you were before?
24. If COVID-19 second outbreak, how much confidence do you have in your ability to deal with the economic, work and life stress caused by the outbreak?
