# Supplementary material for: China says no towards the second large-scale COVID-19 outbreak: voices from the online public
Source: PubMed Central journal article supplement — Gen Psychiatr. 2021 Oct 18;34(5):e100517. doi: 10.1136/gpsych-2021-100517 (PMC8523963; doi:10.1136/gpsych-2021-100517), 2021-10-18
Supplement: gpsych-2021-100517supp002.pdf [file gpsych-2021-100517supp002.pdf]

Table 1. Demographic information, group differences of public's perceptions on the three most critical questions (n=2399)

| variables                  | Category               | N/%                  | Question 1 |      |            |        | Question 2 |      |            |        | Question 3 |      |            |        |
|----------------------------|------------------------|----------------------|------------|------|------------|--------|------------|------|------------|--------|------------|------|------------|--------|
|                            |                        |                      | Mean       | SD   | $\chi^2/Z$ | P      | Mean       | SD   | $\chi^2/Z$ | P      | Mean       | SD   | $\chi^2/Z$ | P      |
| Gender                     | Male                   | 986 /41.10%          | 2.17       | 0.90 | -0.815     | 0.415  | 4.60       | 0.72 | -1.563     | 0.118  | 3.60       | 1.18 | -2.361     | 0.018  |
|                            | Female                 | 1413/58.90%          | 2.18       | 0.81 |            |        | 4.58       | 0.71 |            |        | 3.49       | 1.15 |            |        |
| Age                        | 15-25                  | 1413/58.90%          | 2.30       | 0.86 | 48.187     | 0.000  | 4.65       | 0.68 | 22.164     | 0.000  | 3.50       | 1.15 | 16.299     | 0.006  |
|                            | 26-30                  | 368/15.34%           | 2.12       | 0.80 |            |        | 4.60       | 0.71 |            |        | 3.38       | 1.22 |            |        |
|                            | 31-40                  | 561/23.38%           | 2.14       | 0.87 |            |        | 4.58       | 0.67 |            |        | 3.53       | 1.21 |            |        |
|                            | 41-50                  | 289/12.05%           | 2.06       | 0.80 |            |        | 4.54       | 0.73 |            |        | 3.62       | 1.11 |            |        |
|                            | 51-60                  | 230/9.59%            | 1.96       | 0.83 |            |        | 4.45       | 0.82 |            |        | 3.73       | 1.06 |            |        |
|                            | ≥61                    | 66/2.75%             | 2.20       | 0.88 |            |        | 4.44       | 0.88 |            |        | 3.77       | 1.08 |            |        |
|                            | Educational level      | High school or below | 168/7.00%  | 1.98 | 0.82       | 20.320 | 0.000      | 4.59 | 0.74       | 14.846 | 0.001      | 3.13 | 1.37       | 18.670 |
| University or college      |                        | 1644/68.53%          | 2.21       | 0.84 |            |        | 4.62       | 0.70 |            |        | 3.55       | 1.55 |            |        |
| Postgraduate or above      |                        | 587/24.47%           | 2.12       | 0.86 |            |        | 4.51       | 0.74 |            |        | 3.62       | 1.13 |            |        |
| Occupation                 | Current student        | 776/32.35%           | 2.30       | 0.87 | 30.399     | 0.000  | 4.66       | 0.67 | 26.635     | 0.000  | 3.50       | 1.13 | 60.861     | 0.000  |
|                            | Government functionary | 399/16.63%           | 2.08       | 0.79 |            |        | 4.66       | 0.62 |            |        | 3.82       | 1.15 |            |        |
|                            | Professional staff b   | 660/27.51%           | 2.11       | 0.85 |            |        | 4.55       | 0.70 |            |        | 3.64       | 1.11 |            |        |
|                            | Other industries c     | 564/23.51%           | 2.13       | 0.84 |            |        | 4.48       | 0.82 |            |        | 3.26       | 1.22 |            |        |
| Lived in Hubei             | Yes                    | 39/1.63%             | 2.18       | 0.79 | -0.180     | 0.857  | 4.51       | 0.85 | -0.386     | 0.700  | 3.51       | 1.17 | -0.136     | 0.892  |
|                            | No                     | 2360/98.37%          | 2.17       | 0.85 |            |        | 4.59       | 0.71 |            |        | 3.54       | 1.17 |            |        |
| high-risk group            | Yes                    | 106/4.42%            | 2.25       | 0.87 | -0.924     | 0.355  | 4.47       | 0.80 | -1.545     | 0.355  | 3.58       | 1.17 | -0.366     | 0.714  |
|                            | No                     | 2293/95.58%          | 2.17       | 0.85 |            |        | 4.59       | 0.71 |            |        | 3.53       | 1.17 |            |        |
| Anti-epidemic actions      | Yes                    | 589/24.55%           | 2.17       | 0.86 | -0.073     | 0.941  | 4.62       | 0.69 | -1.569     | 0.117  | 3.75       | 1.12 | -5.183     | 0.000  |
|                            | No                     | 1810/75.45%          | 2.17       | 0.84 |            |        | 4.58       | 0.72 |            |        | 3.46       | 1.17 |            |        |
| Work stress                | Yes                    | 1115/46.48%          | 2.20       | 0.88 | -1.348     | 0.178  | 4.56       | 0.74 | -1.612     | 0.107  | 3.50       | 1.15 | -1.457     | 0.145  |
|                            | No                     | 1284/53.52%          | 2.15       | 0.82 |            |        | 4.61       | 0.69 |            |        | 3.57       | 1.18 |            |        |
| Economic pressure          | Yes                    | 801/33.39%           | 2.27       | 0.91 | -3.441     | 0.001  | 4.54       | 0.75 | -2.591     | 0.010  | 3.15       | 1.19 | -11.127    | 0.000  |
|                            | No                     | 1598/66.61%          | 2.14       | 0.81 |            |        | 4.61       | 0.69 |            |        | 3.73       | 1.11 |            |        |
| Family-relationship stress | Yes                    | 557/23.22%           | 2.32       | 0.91 | -4.375     | 0.000  | 4.56       | 0.76 | -0.595     | 0.552  | 3.38       | 1.14 | -3.474     | 0.000  |
|                            | No                     | 1842/76.78%          | 2.13       | 0.82 |            |        | 4.60       | 0.70 |            |        | 3.58       | 1.17 |            |        |
| Children education stress  | Yes                    | 393/16.38%           | 2.18       | 0.90 | -0.173     | 0.862  | 4.57       | 0.70 | -1.037     | 0.300  | 3.51       | 1.17 | -0.613     | 0.540  |
|                            | No                     | 2006/83.62%          | 2.17       | 0.84 |            |        | 4.59       | 0.72 |            |        | 3.54       | 1.16 |            |        |
| Social stress              | Yes                    | 911/37.97%           | 2.21       | 0.86 | -1.756     | 0.079  | 4.55       | 0.74 | -1.909     | 0.056  | 3.55       | 1.14 | -0.280     | 0.780  |
|                            | No                     | 1488/62.03%          | 2.15       | 0.84 |            |        | 4.61       | 0.70 |            |        | 3.53       | 1.18 |            |        |

Government

functionary: military/government worker/officer /civil servant; <sup>b</sup> Professional staff: doctor/lawyer/journalist/teacher; <sup>c</sup> Other industries: people who are not in the above three types of occupations.
