# Supplementary material for: China says no towards the second large-scale COVID-19 outbreak: voices from the online public
Source: PubMed Central journal article supplement — Gen Psychiatr. 2021 Oct 18;34(5):e100517. doi: 10.1136/gpsych-2021-100517 (PMC8523963; doi:10.1136/gpsych-2021-100517), 2021-10-18
Supplement: gpsych-2021-100517supp003.pdf [file gpsych-2021-100517supp003.pdf]

Table 2. Statistical description of the public’s states and perceptions related to the COVID-19 pandemic.

| Question                                                                                                                                              | severity / Frequency (n/%) |                       |                       |                      |                       |
|-------------------------------------------------------------------------------------------------------------------------------------------------------|----------------------------|-----------------------|-----------------------|----------------------|-----------------------|
|                                                                                                                                                       | Not at all<br>(value=1)    | a little<br>(value=2) | Moderate<br>(value=3) | largely<br>(value=4) | entirely<br>(value=5) |
| The extent to which your mental state was affected by the past COVID-19 epidemic?                                                                     | 376/15.67%                 | 1147/47.81%           | 578/24.09%            | 251/10.46%           | 47/1.96%              |
| The extent to which your work and life were affected by the past COVID-19 epidemic?                                                                   | 304/12.67%                 | 922/38.43%            | 712/29.68%            | 378/15.76%           | 83/3.46%              |
| How often you still following the reports related to the epidemic?                                                                                    | 72/3%                      | 783/32.64%            | 460/19.17%            | 750/31.26%           | 334/13.92%            |
| How often you insist on wearing a mask seriously except the places or occasions where it is required?                                                 | 284/11.84%                 | 535/22.30%            | 414/17.26%            | 594/24.76%           | 572/23.84%            |
| What do you think is the likelihood of a secondary large-scale outbreak in China? ( <i>Question 1</i> )                                               | 430/17.92%                 | 1343/55.98%           | 449/18.72%            | 135/5.63%            | 42/1.75%              |
| If COVID-19 second outbreak, how much confidence do you have in government’s ability to deal with the epidemic? ( <i>Question 2</i> )                 | 8/0.33%                    | 58/2.42%              | 98/4.09%              | 588/24.51%           | 1647/68.65%           |
| If COVID-19 second outbreak, how much confidence do you have in your ability to deal with the economic, work and life stress caused by the outbreak?、 | 91/3.79%                   | 434/18.09%            | 599/24.97%            | 651/27.14%           | 624/26.01%            |
| If COVID-19 second outbreak, and based on mass vaccination, do you think it’s necessary to follow the existing, standard public health measures?      | 87/3.63%                   | 310/12.92%            | 476/19.84%            | 722/30.10%           | 804/33.51%            |
| If there is a confirmed COVID-19 case in your city, the degree to which you feel anxious, nervous, worried, or afraid?                                | 426/17.76%                 | 969/40.39%            | 756/31.51%            | 185/7.71%            | 63/2.63%              |
| If COVID-19 second outbreak, will you be as anxious, nervous, worried, scared, and fearful as you were before?                                        | 658/27.43%                 | 1105/46.06%           | 443/18.47%            | 143/5.96%            | 50/2.08%              |
